# Supplementary material for: Synthesis and characterization of amphiphilic triblock Copolymers with Identical compositions but different block sequences
Source: Royal Society of Chemistry journal article supplement (doi:10.1039/c4ra07084d), 2014-01-01
Supplement: c4ra07084d1.pdf [file c4ra07084d1.pdf]

# Supporting Information

## Synthesis and Characterization of Amphiphilic Triblock Copolymers with Identical Compositions but Different Block Sequences

Chengjiao Lu, Lingdi Chen, Kun Huang, Guowei Wang\*

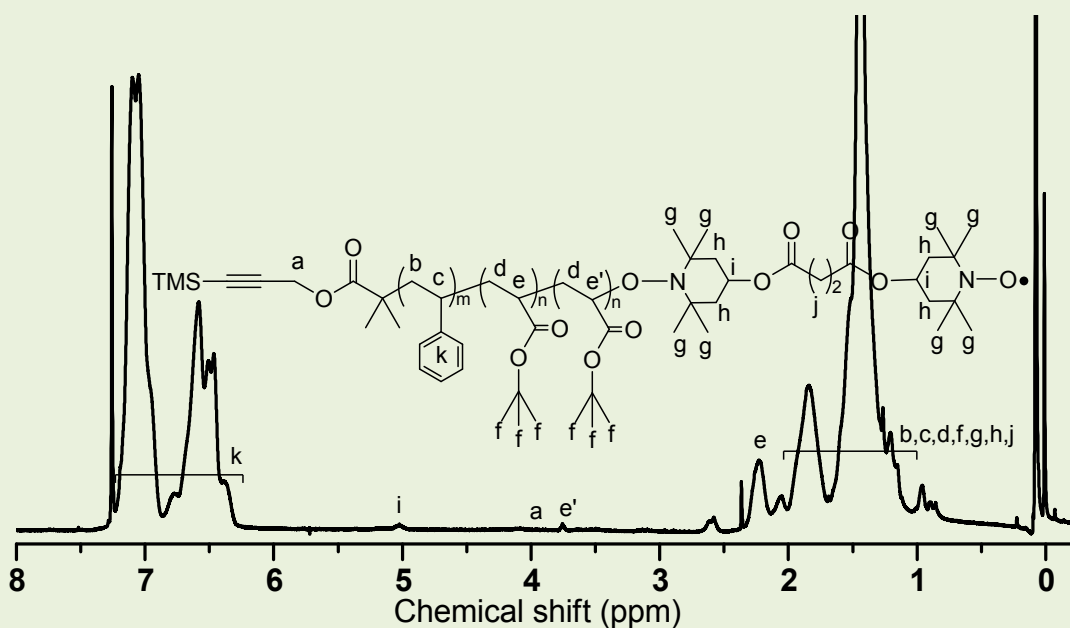

FIGURE S1 The <sup>1</sup>H NMR spectrum of TMS-≡-PS-*b*-PtBA-TEMPO (in CDCl<sub>3</sub> solvent).

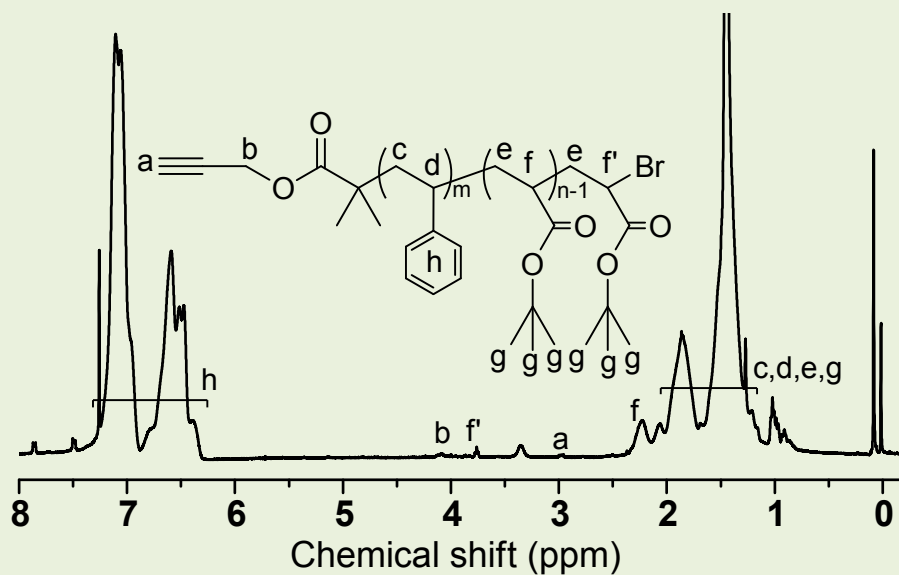

FIGURE S2 The  $^1\text{H}$  NMR spectrum of  $\equiv\text{-PS-}b\text{-PtBA-Br}$  (in  $\text{CDCl}_3$  solvent).

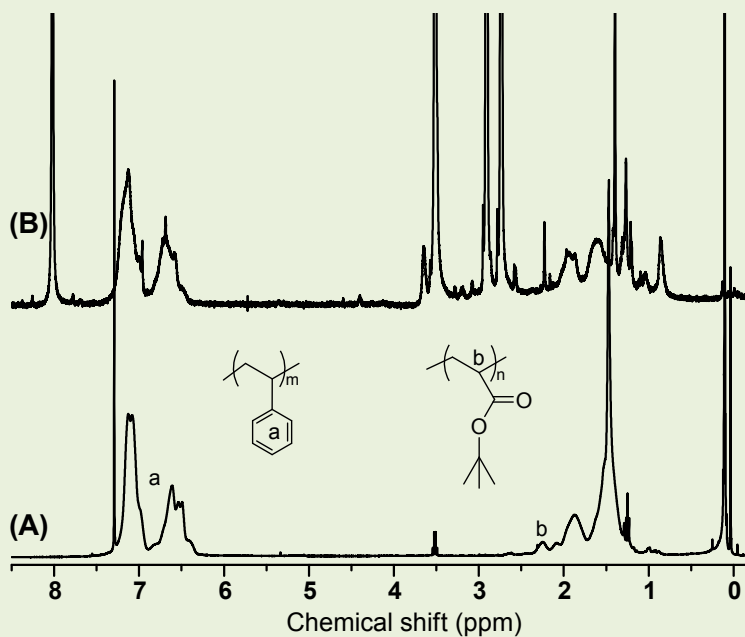

FIGURE S3 The  $^1\text{H}$  NMR spectra of  $\text{PtBA-}b\text{-PS-}b\text{-PtBA}$  (A) (in  $\text{CDCl}_3$  solvent) and  $\text{PAA-}b\text{-PS-}b\text{-PAA}$  (B) (in  $\text{DMF-d}_7$  solvent).

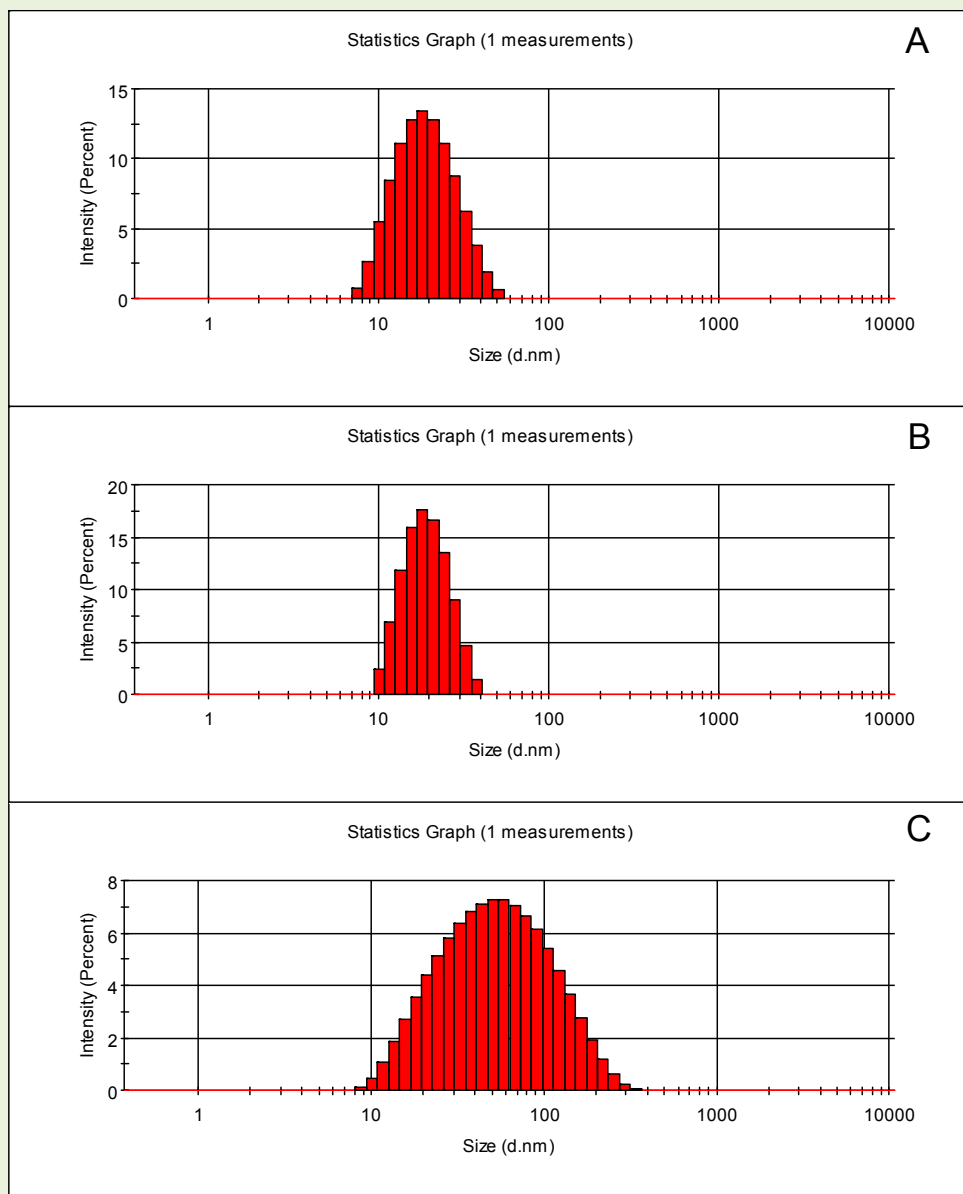

**Figure S4** Size distribution of micelles formed by PS-*b*-PAA (A), PS-*b*-PAA-*b*-PS (B) and PAA-*b*-PS-*b*-PAA (C) in water.
